# Supplementary material for: Dietary Boswellia serrata Acid Alters the Gut Microbiome and Blood Metabolites in Experimental Models
Source: MDPI journal article supplement (doi:10.3390/nu14040814), 2022-02-15
Supplement: s1 [file s1]

Supplementary Table S1. Differential abundant metabolites identified after 14 days treatment of AKBA

| Metabolite                  | m/z_ retention time (min) | I/D      | P- Value | Possible formula                                              | Possible compound                                                                                                                                       | Possible formula                                            | Possible compound                                             |
|-----------------------------|---------------------------|----------|----------|---------------------------------------------------------------|---------------------------------------------------------------------------------------------------------------------------------------------------------|-------------------------------------------------------------|---------------------------------------------------------------|
| <i>Male Feature Level</i>   |                           |          |          |                                                               |                                                                                                                                                         |                                                             |                                                               |
| <u>1</u>                    | 163.0594__184.36          | Decrease | 1.08E-05 | C <sub>4</sub> H <sub>10</sub> N <sub>3</sub> O <sub>4</sub>  | 2-(3-Amino-3-carboxypropyl)-1-hydroxy-1-oxohydrazinium; 1,1-Bis(2-hydroxyethyl)-3-oxo-2-triazanolate; N-[bis(2-hydroxyethyl)amino]-N-oxidonitrous amide | C <sub>10</sub> H <sub>12</sub> S                           | <sup>1</sup> Unidentifiable; 205 results found                |
| 2                           | 174.0438__92.03           | Increase | 1.08E-05 | C <sub>9</sub> H <sub>7</sub> N <sub>2</sub> O <sub>2</sub>   | <sup>1</sup> Unidentifiable; 23 results found                                                                                                           | C <sub>7</sub> H <sub>7</sub> N <sub>5</sub> O              | 5-(3-amino-1H-1,2,4-triazol-5-yl)pyridine-3-ol                |
| 3                           | 179.1289__271.38          | Increase | 0.00032  | C <sub>8</sub> H <sub>20</sub> O <sub>4</sub>                 | 2-[2-(2-Methoxyethoxy)ethoxy]ethanol - methane (1:1); di(propylene glycol) methyl ether                                                                 | C <sub>9</sub> H <sub>16</sub> N <sub>4</sub>               | N2-[2-(dimethylamino)ethyl]pyridine-2,5-diamine               |
| 4                           | 148.0612__50.23           | Decrease | 0.00049  | C <sub>5</sub> H <sub>11</sub> NO <sub>4</sub>                | <sup>1</sup> Unidentifiable; 351 results found                                                                                                          | C <sub>3</sub> H <sub>9</sub> N <sub>4</sub> O <sub>3</sub> | 1-Hydroxy-2-[N'-(2-hydroxyethyl)carbamidoyl]-1-oxohydrazinium |
| <i>Female Feature Level</i> |                           |          |          |                                                               |                                                                                                                                                         |                                                             |                                                               |
| 1                           | 126.9198__34.12           | Decrease | 4.33E-05 | Unidentifiable                                                | Unidentifiable                                                                                                                                          |                                                             |                                                               |
| 2                           | 151.058__178.14           | Decrease | 8.66E-05 | C <sub>3</sub> H <sub>10</sub> N <sub>3</sub> O <sub>4</sub>  | Unidentifiable                                                                                                                                          |                                                             |                                                               |
| 3                           | 217.1336__196.45          | Increase | 0.00015  | C <sub>11</sub> H <sub>16</sub> N <sub>5</sub>                | 5-(2,2-Dimethylcyclopropyl)imidazo[4,5-b]pyridine-3-ium-1,3-diamine                                                                                     | C <sub>10</sub> H <sub>20</sub> NO <sub>4</sub>             | Aclatonium; (propionyloxy)-1-propanaminium                    |
| 4                           | 118.0548__32.78           | Decrease | 0.00015  | C <sub>7</sub> H <sub>6</sub> N <sub>2</sub>                  | Benzimidazole; Indazole; Phenylidiazomethane, (Diazomethyl) benzene                                                                                     |                                                             |                                                               |
| 5                           | 155.0301__33.31           | Decrease | 0.00025  | Unidentifiable                                                | Unidentifiable                                                                                                                                          |                                                             |                                                               |
| <u>6</u>                    | 163.0594__184.36          | Decrease | 0.00025  | C <sub>4</sub> H <sub>10</sub> N <sub>3</sub> O <sub>4</sub>  | 2-(3-Amino-3-carboxypropyl)-1-hydroxy-1-oxohydrazinium; 1,1-Bis(2-hydroxyethyl)-3-oxo-2-triazanolate; N-[bis(2-hydroxyethyl)amino]-N-oxidonitrous amide | C <sub>10</sub> H <sub>12</sub> S                           | <sup>1</sup> Unidentifiable; 205 results found                |
| 7                           | 107.0627__177.89          | Decrease | 0.00025  | Unidentifiable                                                | Unidentifiable                                                                                                                                          |                                                             |                                                               |
| 8                           | 146.0783__172.75          | Decrease | 0.00065  | C <sub>7</sub> H <sub>15</sub> OS                             | Dimethyl(tetrahydro-2-furanyl)methyl)sulfonium; 1-Isopropoxytetrahydrothiophenium                                                                       |                                                             |                                                               |
| 9                           | 202.1322__184.9           | Decrease | 0.00065  | C <sub>9</sub> H <sub>19</sub> N <sub>2</sub> O <sub>3</sub>  | <sup>1</sup> Unidentifiable; 14 results found                                                                                                           |                                                             |                                                               |
| 10                          | 164.0912__80.22           | Decrease | 0.00065  | C <sub>6</sub> H <sub>15</sub> NO <sub>4</sub>                | <sup>1</sup> Unidentifiable; 38 results found                                                                                                           |                                                             |                                                               |
| 11                          | 190.0734__173.21          | Decrease | 0.00097  | C <sub>10</sub> H <sub>11</sub> N <sub>2</sub> O <sub>2</sub> | <sup>1</sup> Unidentifiable; 62 results found                                                                                                           | C <sub>3</sub> H <sub>11</sub> N <sub>8</sub> S             | Unidentifiable                                                |
| 12                          | 200.0341__204.76          | Increase | 0.00145  | C <sub>9</sub> H <sub>5</sub> N <sub>4</sub> O <sub>2</sub>   | 3-Cyano-7-methylpyrazolo[1,5-a]pyrimidine-6-carboxylate; 5-(5H-Tetrazol-5-ylidene)-3,5-dihydro-2-benzofuran-1-olate                                     | C <sub>9</sub> H <sub>13</sub> OS <sub>2</sub>              | <sup>1</sup> Unidentifiable; 46 results found                 |

<sup>1</sup> Unidentifiable with more than 4 results via ChemSpider databases are linked in supplementary data
